# Supplementary material
Source: publisher site journal article supplement (http://kjim.org/upload/media/kjim-2023-184-Supplementary.pdf)
Supplement: Supplementary file 1 [file kjim-2023-184-Supplementary.pdf]

**Supplementary File. Search strategy**

- 1 (((stomach or gastric) adj2 (cancer\* or adenocarcinoma\* or ADC\* or carcinoma\* or malignanc\* or neoplas\* or tumorigenesis)) or EGC\*).mp.
- 2 ((stomach or gastric) adj2 (neoplas\* or tumor\*)),ti,ab.
- 3 1 or 2
- 4 (dysplasia\* or adenoma\* or artificial ulcer\*).ti.
- 5 (gastrointestinal stromal tumor\* or GIST\* or carcinoid\*).ti,ab.
- 6 4 or 5
- 7 3 not 6
- 8 exp Endoscopic Mucosal Resection/
- 9 (endoscopic\* adj2 (resect\* or treat\*)).mp.
- 10 ("endoscopic submucosal dissection" or "endoscopic mucosal resection" or mucosectomy or ESD or EMR).mp.
- 11 or/8-10
- 12 (gastrectomy or surgery or surgical or postoperative or lymphadenectomy or radical or chemotherapy or chemoradiation or radiation or technique or imaging or laser).mp.
- 13 11 not 12
- 14 7 and 13
- 15 exp Gastritis, Atrophic/ or exp Pepsinogen A/
- 16 (atroph\* or (intestin\* adj2 metaplasia) or "intestinal type" or "metaplastic gastritis").mp.
- 17 (Kimura-Takemoto or Sydney or Kyoto) classification or OLGA or "operative link on gastritis assessment" or OLGIM or "operative link on gastric intestinal metaplasia assessment" or pepsinogen
- 18 or/15-17
- 19 14 and 18
- 20 exp Neoplasms, Second Primary/
- 21 (metachronous or recurren\* or second\* or subsequen\*).mp.
- 22 20 or 21
- 23 19 and 22
- 24 23 use pmez
- 25 ("case reports" or review).pt.
- 26 (case\* or "case report" or review or guide or guideline\* or consensus or letter or reply).ti.
- 27 25 or 26
- 28 24 not 27
- 29 limit 28 to yr="1946-current"
- 30 (((stomach or gastric) adj2 (cancer\* or adenocarcinoma\* or ADC\* or carcinoma\* or malignanc\* or tumorigenesis)) or EGC\*).mp.
- 31 ((stomach or gastric) adj2 (neoplas\* or tumor\*)),ti,ab,kw.
- 32 30 or 31
- 33 (dysplasia\* or adenoma\* or artificial ulcer\*).ti.
- 34 (gastrointestinal stromal tumor\* or GIST\* or carcinoid\*).ti,ab.
- 35 33 or 34
- 36 32 not 35
- 37 exp Endoscopic Submucosal Dissection/ or exp Endoscopic Mucosal Resection/
- 38 (endoscopic\* adj2 (resect\* or treat\*)).mp.
- 39 ("endoscopic submucosal dissection" or "endoscopic mucosal resection" or mucosectomy or ESD or EMR).mp.
- 40 or/37-39
- 41 (gastrectomy or surgery or surgical or postoperative or lymphadenectomy or radical or chemotherapy or chemoradiation or radiation or technique or imaging or laser).mp.
- 42 40 not 41
- 43 36 and 42
- 44 exp Atrophic Gastritis/ or exp Intestine Metaplasia/ or exp Pepsinogen I/
- 45 (atroph\* or (intestin\* adj2 metaplasia) or "intestinal type" or "metaplastic gastritis").mp.
- 46 ((Kimura-Takemoto or Sydney or Kyoto) classification or OLGA or "operative link on gastritis assessment" or OLGIM or "operative link on gastric intestinal metaplasia assessment" or pepsinogen).tx
- 47 or/44-46

- 48 41 and 47
- 49 exp Metachronous Gastric Cancer/
- 50 (metachronous or recurren\* or second\* or subsequen\*).mp.
- 51 48 or 49
- 52 48 and 51
- 53 52 use oemezd
- 54 ("case reports" or review).pt.
- 55 (case\* or "case report" or review or guide or guideline\* or consensus or letter or reply).ti.
- 56 54 or 55
- 57 53 not 56
- 58 limit 57 to yr="1974-current"
- 59 (((stomach or gastric) adj2 (cancer\* or adenocarcinoma\* or ADC\* or carcinoma\* or malignanc\* or tumorigenesis or neoplas\* or tumor\*)) or EGC\*).ti,ab,kw.
- 60 (dysplasia\* or adenoma\* or artificial ulcer\* or "gastrointestinal stromal tumor\*" or GIST\* or carcinoid\*).ti.
- 61 (gastrointestinal stromal tumor\* or GIST\* or carcinoid\*).ab.
- 62 60 or 61
- 63 59 not 62
- 64 exp Endoscopic Mucosal Resection/
- 65 ((endoscopic\* adj2 (resect\* or treat\*)) or "endoscopic submucosal dissection" or "endoscopic mucosal resection" or mucosectomy or ESD or EMR).ti,ab,kw.
- 66 64 or 65
- 67 (gastrectomy or surgery or surgical or postoperative or lymphadenectomy or radical or chemotherapy or chemoradiation or radiation or technique or imaging or laser).ti.
- 68 66 not 67
- 69 63 and 68
- 70 exp Gastritis, Atrophic/
- 71 exp Pepsinogen A/
- 72 (atroph\* or (intestin\* adj2 metaplasia) or "intestinal type" or "metaplastic gastritis").ti,ab,kw.
- 73 ((Kimura-Takemoto or Sydney or Kyoto) classification or OLGA or "operative link on gastritis assessment" or OLGIM or "operative link on gastric intestinal metaplasia assessment" or pepsinogen).tx
- 74 or/70-73
- 75 69 and 74
- 76 exp Neoplasms, Second Primary/
- 77 (metachronous or recurren\* or second\* or subsequen\*).ti,ab,kw.
- 78 76 or 77
- 79 75 and 78
- 80 79 use coch
- 81 ("case report form" or review process").pt.
- 82 (case\* or "case report" or review or guide or guideline\* or consensus or letter or reply).ti.
- 83 81 or 82
- 84 80 not 83
- 85 29 or 58 or 84
- 86 remove duplicates from 85
